# Supplementary material for: Electrical cell-substrate impedance sensing with field-effect transistors is able to unravel cellular adhesion and detachment processes on a single cell level
Source: Royal Society of Chemistry journal article supplement (doi:10.1039/c4lc00593g), 2014-11-06
Supplement: c4lc00593g1.pdf [file c4lc00593g1.pdf]

## Supporting information

### A) Experimental setup

**Figure 1S.** Schematic diagram of the experimental setup with a fast lock-in amplifier.

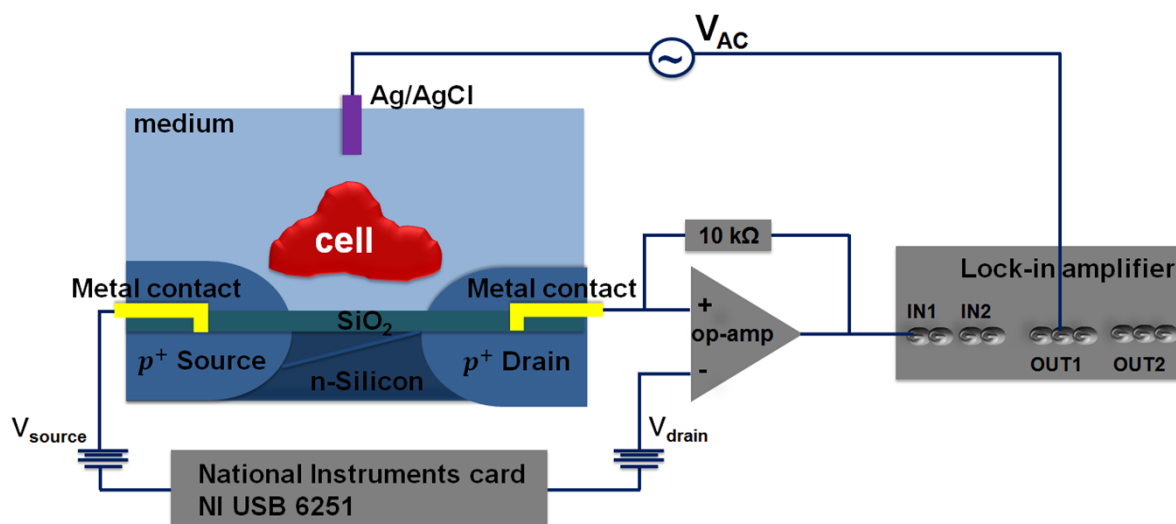

### B) Derivation of the analytical solution

The transfer function is defined by the ratio of the input and the output voltage of the amplifier.

$$H(j\omega) = \frac{U_{out}(j\omega)}{U_{in}(j\omega)} \quad (1)$$

The output voltage is then given by equation (2)

$$U_{out}(j\omega) = -R_{feedback} I_{DS}(j\omega) \quad (2),$$

where  $R_{feedback}$  is the feedback resistance in the transimpedance amplifier stage. In the following we will derive an expression for  $I_{DS}(j\omega)$ , which will then provide an analytical solution for the measured TTF-spectra  $U_{out}(j\omega)$  for the simplified EEC presented in Figure 2S.

**Figure 2S.** A simplified equivalent electronic circuit, which describes a FET device in contact with an adherent cell on top of the transistor gate. The adhered cell can be modeled in a first approach by two elements namely the membrane capacitance  $C_M$  and the seal resistance  $R_{seal}$ .

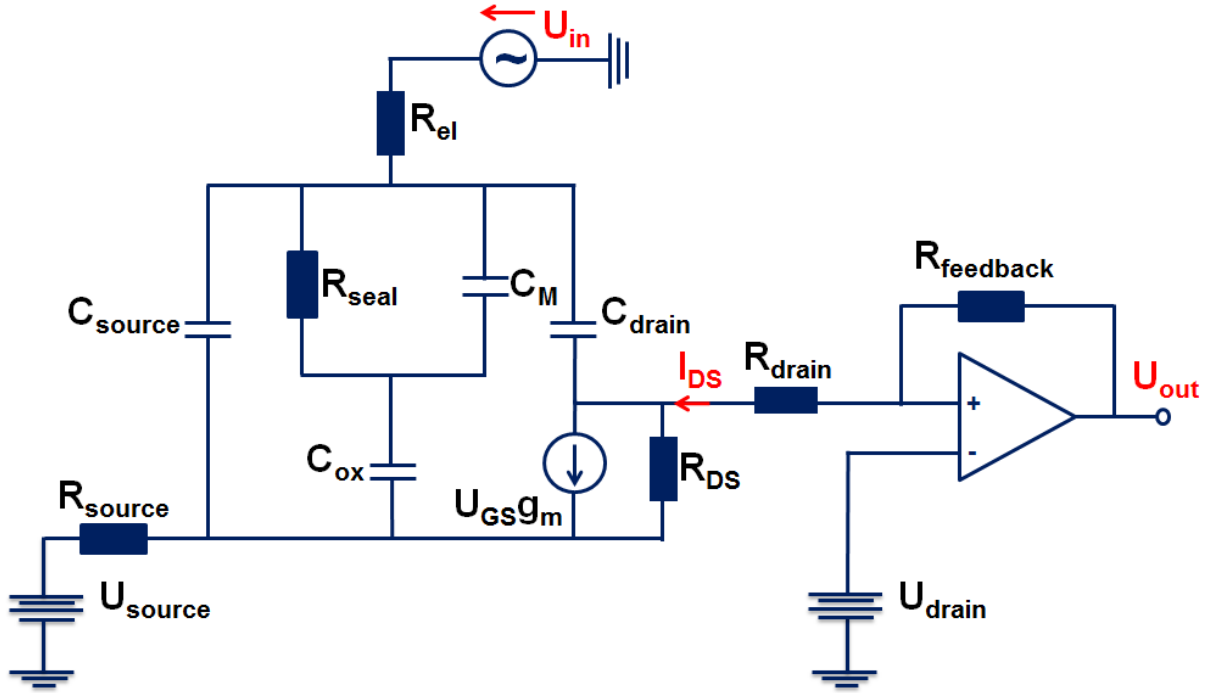

Based on Kirchhoff's first law the drain-source current  $I_{DS}$  is equal to:

$$I_{DS}(j\omega) = g_m U_{GS}(j\omega) - j\omega C_{drain} U_1(j\omega) \quad (3),$$

where  $U_1(j\omega)$  is the voltage across the drain contact line capacitance  $C_{drain}$  (Figure 3Sa). The gate-source voltage  $U_{GS}(j\omega)$  can be found using a divider consisting of the impedance  $Z_1$  and the gate oxide capacitance  $C_{ox}$  (Figure 3Sb). The impedance of the adherent cell  $Z_1$ , which is modeled by  $C_M$  and  $R_{seal}$  connected in parallel (Figure 3Sa), can be found using the rules for combining impedances in parallel:

$$Z_1 = \frac{R_{seal}}{1 + j\omega R_{seal} C_M} \quad (4)$$

**Figure 3S.** (a) The parallel configuration of the membrane capacitance  $C_M$  and the junction resistance  $R_{seal}$  can be combined to the total impedance  $Z_1$ . (b) A voltage divider consisting of the impedance  $Z_1$  and the gate oxide capacitance  $C_{ox}$

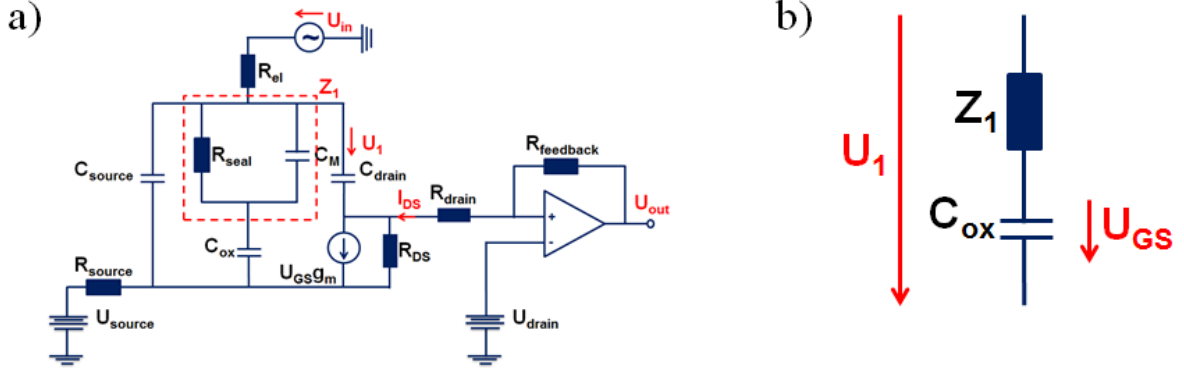

Considering a voltage divider of two impedances in series (Figure 3Sb) (equation (5)), we can find an expression for the gate-source voltage  $U_{GS}(j\omega)$  (equation (6)).

$$\frac{U_1(j\omega)}{Z_1 + 1/j\omega C_{ox}} = \frac{U_{GS}(j\omega)}{1/j\omega C_{ox}} \quad (5)$$

$$U_{GS}(j\omega) = U_1(j\omega) \frac{1 + j\omega R_{seal} C_M}{1 + j\omega R_{seal} (C_M + C_{ox})} \quad (6)$$

This expression can be included into equation (3):

$$I_{DS}(j\omega) = U_1(j\omega) \left( g_m \frac{1 + j\omega R_{seal} C_M}{1 + j\omega R_{seal} (C_M + C_{ox})} - j\omega C_{drain} \right) \quad (7)$$

$$I_{DS}(j\omega) = g_m U_1(j\omega) \left( \frac{1 + j\omega \left( R_{seal} C_M - \frac{C_{drain}}{g_m} \right) + \omega^2 R_{seal} \frac{C_{drain}}{g_m} (C_M + C_{ox})}{1 + j\omega R_{seal} (C_M + C_{ox})} \right) \quad (8)$$

Hence the transfer function can be written as following:

$$H(j\omega) = R_{feedback} g_m \frac{U_1(j\omega)}{U_{in}(j\omega)} \left( \frac{1 + j\omega \left( R_{seal} C_M - \frac{C_{drain}}{g_m} \right) + \omega^2 R_{seal} \frac{C_{drain}}{g_m} (C_M + C_{ox})}{1 + j\omega R_{seal} (C_M + C_{ox})} \right) \quad (9)$$

The input voltage  $U_{in}$  can be calculated by a voltage divider (Figure 4Sb):

$$\frac{U_{in}(j\omega)}{R_{el} + Z_2} = \frac{U_1(j\omega)}{Z_2} \quad (10),$$

where  $Z_2$  is the impedance of the elements connected in parallel namely source contact line capacitance  $C_{source}$ , the drain contact line capacitance  $C_{drain}$  and the impedance consisting of the impedance  $Z_1$  and the gate oxide capacitance in series (Figure 4Sa).

**Figure 4S.** (a) The elements namely source contact line capacitance  $C_{source}$ , the drain contact line capacitance  $C_{drain}$  and the impedance consisting of the impedance  $Z_1$  and the gate oxide capacitance  $C_{ox}$  in series can be combined to one impedance  $Z_2$  across these the same voltage  $U_1$  drops. (b) A voltage divider consisting of the resistance  $R_{el}$  and the impedance  $Z_2$

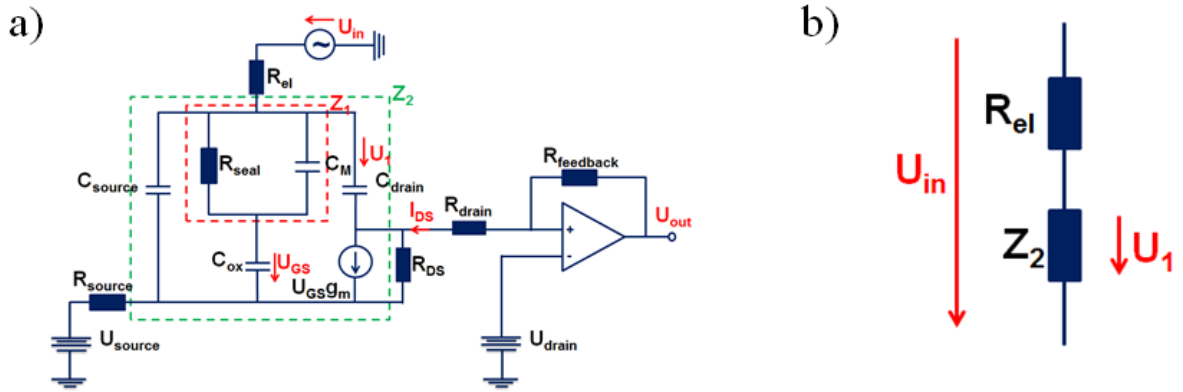

$$\frac{1}{Z_2} = j\omega(C_{source} + C_{drain}) + \frac{j\omega C_{ox}(1 + j\omega R_{seal}C_M)}{1 + j\omega R_{seal}(C_M + C_{ox})} \quad (11)$$

$$Z_2 = \frac{1 + j\omega R_{seal}(C_M + C_{ox})}{j\omega(C_L + C_{ox}) - \omega^2 R_{seal}(C_L(C_M + C_{ox}) + C_M C_{ox})}$$

(12),

where the capacitances of the contact lines can be combined to  $C_L = C_{source} + C_{drain}$

$$Z = R_{el} + Z_2 = \frac{1 + j\omega(R_{el}(C_L + C_{ox}) + R_{seal}(C_M + C_{ox})) - \omega^2 R_{el}R_{seal}(C_L(C_M + C_{ox}) + C_M C_{ox})}{j\omega(C_L + C_{ox}) - \omega^2 R_{seal}(C_L(C_M + C_{ox}) + C_M C_{ox})}$$

(13)

From this it follows that:

$$\frac{U_1(j\omega)}{U_{in}(j\omega)} = \frac{Z_2}{Z} = \frac{1 + j\omega R_{seal}(C_M + C_{ox})}{1 + j\omega(R_{el}((C_s + C_d + C_{ox})) + R_{seal}(C_M + C_{ox})) - \omega^2 R_{el}R_{seal}((C_s + C_d)(C_M + C_{ox}) + C_M C_{ox})}$$

(14)

Finally, we need to consider the low pass characteristics of the first amplifier stage.

The equation (14) can be included into equation (8), which results in an analytical solution for the TTF-spectra of a single cell in contact to an FET sensor:

$$H(j\omega) = R_{feedback}g_m \frac{1 + j\omega\left(R_{seal}C_M - \frac{C_d}{g_m}\right) - \omega^2 R_{seal}C_d(C_M + C_{ox})}{1 + j\omega(R_{el}((C_L + C_{ox})) + R_{seal}(C_M + C_{ox})) - \omega^2 R_{el}R_{seal}(C_L(C_M + C_{ox}) + C_M C_{ox})}$$

(15),

where  $f_g$  is the cutoff frequency of the operational amplifier, which takes the low pass effect of the transimpedance amplifier into account. This equation can now be used to fit the resulting TFF spectra in our experiments and to extract the adhesion-related data  $R_{seal}$  and  $C_M$  out of these spectra.
